# Supplementary material for: Distinct Mutational Behaviors Differentiate Short Tandem Repeats from Microsatellites in the Human Genome
Source: PubMed Central journal article supplement — Genome Biol Evol. 2012 Dec 13;5(3):606–20. doi: 10.1093/gbe/evs116 (PMC3622297; doi:10.1093/gbe/evs116), 2012-12-13

**Table S1. The numbers of TRs in the three populations (A) before and after upper thresholding; (B) separated by motif size and repeat number after upper thresholding.**

A.

| Population | Number of TRs        |                       |
|------------|----------------------|-----------------------|
|            | Before upper cut-off | After upper cut-off * |
| YRI        | 453,854,766          | 453,500,758           |
| CEU        | 473,350,569          | 472,996,810           |
| JPTCHB     | 473,361,805          | 473,009,688           |

\* In this column, only mono-, di-, tri-, and tetranucleotide TRs under 10-bp, 18-bp, 24-bp, and 28-bp were considered.

**B.**

| TR class | Repeat Number | Number of TRs |           |           |
|----------|---------------|---------------|-----------|-----------|
|          |               | YRI           | CEU       | JPTCHB    |
| Mono     | 2             | 246493315     | 246494715 | 246495135 |
|          | 3             | 82682392      | 82684184  | 82684723  |
|          | 4             | 28102544      | 28103294  | 28104008  |
|          | 5             | 9466463       | 9467098   | 9467380   |
|          | 6             | 2580344       | 2580726   | 2580806   |
|          | 7             | 996553        | 996750    | 996774    |
|          | 8             | 357577        | 356944    | 356799    |
|          | 9             | 142710        | 143814    | 144061    |
|          | 10            | 87945         | 88612     | 89031     |
|          | Di            | 2             | 51119753  | 62970957  |
| 3        |               | 4294322       | 5291957   | 5292472   |
| 4        |               | 560433        | 688397    | 688420    |
| 5        |               | 75393         | 75398     | 75357     |
| 6        |               | 26218         | 26164     | 26030     |
| 7        |               | 12616         | 12676     | 12576     |
| 8        |               | 6929          | 6939      | 6904      |
| 9        |               | 4367          | 4364      | 4365      |
| Tri      |               | 2             | 19270525  | 24136549  |
|          | 3             | 616995        | 772052    | 772051    |
|          | 4             | 47164         | 47121     | 47147     |
|          | 5             | 12949         | 12917     | 12938     |
|          | 6             | 5358          | 5389      | 5353      |
|          | 7             | 2527          | 2472      | 2466      |
|          | 8             | 1327          | 1327      | 1290      |
|          | Tetra         | 2             | 6322125   | 7776436   |
| 3        |               | 165519        | 203244    | 203470    |
| 4        |               | 27514         | 27461     | 27448     |
| 5        |               | 11249         | 11284     | 11236     |
| 6        |               | 5057          | 5007      | 4998      |
| 7        |               | 2575          | 2562      | 2532      |

**Table S2. Proportion of TRs in intergenic+intronic vs. exonic+regulatory regions.**

|                             | <b>Intergenic and<br/>Intronic<br/>regions (%)</b> | <b>Exonic and<br/>Regulatory<br/>regions (%)</b> |
|-----------------------------|----------------------------------------------------|--------------------------------------------------|
| <b>Genomic<br/>coverage</b> | 93.2%                                              | 6.8%                                             |
| <b>Coverage by<br/>TRs</b>  | 92.8%                                              | 7.2%                                             |

The proportions of all (polymorphic and non-polymorphic) microsatellites in putatively neutral regions (intergenic+intronic, 92.8%) vs. those in regions under selective constraints (exonic+regulatory comprising coding exons, UTR exons, and regulatory regions defined as 5 kb upstream and downstream from transcript boundaries, 7.2%) were found to be consistent with the genomic coverage of the two regions (intergenic+intronic: 2,896,745,931 bp (93.2%), exonic+regulatory: 210,598,511 bp (6.8%)).

**Table S3. Linear regression model for (A) log polymorphism incidence (using CEU population data), (B) log polIEF as a function of repeat number.**

**A.**

| TR class     | log(Polymorphism incidence) ~ Repeat number |                         |                |
|--------------|---------------------------------------------|-------------------------|----------------|
|              | Intercept ( <i>P</i> value)                 | Slope ( <i>P</i> value) | R <sup>2</sup> |
| <b>Mono</b>  | -3.347 (1.4E-07)                            | 0.4056 (6.7E-07)        | 97.55%         |
| <b>Di</b>    | -2.872 (4.4E-04)                            | 0.5438 (2.3E-04)        | 91.13%         |
| <b>Tri</b>   | -2.723 (8.3E-03)                            | 0.5874 (4.5E-03)        | 82.77%         |
| <b>Tetra</b> | -3.050 (0.0194)                             | 0.7095 (0.0134)         | 81.74%         |

**B.**

| TR class    | log(PolIEF) ~ Repeat number |                         |                |
|-------------|-----------------------------|-------------------------|----------------|
|             | Intercept ( <i>P</i> value) | Slope ( <i>P</i> value) | R <sup>2</sup> |
| <b>Mono</b> | -5.025 (0.00071)            | 0.3485 (0.00825)        | 92.88%         |
| <b>Di</b>   | -4.608 (3.3E-06)            | 0.1973 (0.00260)        | 86.05%         |

**Table S4. Segmented regression model for log polymorphism incidence as a function of repeat number for mono-, di-, tri-, and tetranucleotide TRs in (A) YRI, (B) JPTCHB.**

**A.**

| TR class     | log(Polymorphism incidence) ~ Repeat number |                             |                          |                          |                                        |                |
|--------------|---------------------------------------------|-----------------------------|--------------------------|--------------------------|----------------------------------------|----------------|
|              | Change-point                                | Intercept ( <i>P</i> value) | Slope below change-point | Slope above change-point | <i>P</i> value for difference in slope | R <sup>2</sup> |
| <b>Mono</b>  | 8.373                                       | -3.986<br>(0.00023)         | 0.512                    | 0.295                    | 0.0561                                 | 99.54%         |
| <b>Di</b>    | 4.519                                       | -4.231<br>(3.8E-05)         | 1.014                    | 0.282                    | 2.2E-16                                | 99.69%         |
| <b>Tri</b>   | 3.327                                       | -6.204<br>(0.00021)         | 1.921                    | 0.297                    | 2.2E-16                                | 99.83%         |
| <b>Tetra</b> | 3.321                                       | -5.176<br>(0.0040)          | 1.656                    | 0.310                    | 2.2E-16                                | 99.78%         |

**B.**

| TR class     | log(Polymorphism incidence) ~ Repeat number |                             |                          |                          |                                        |                |
|--------------|---------------------------------------------|-----------------------------|--------------------------|--------------------------|----------------------------------------|----------------|
|              | Change-point                                | Intercept ( <i>P</i> value) | Slope below change-point | Slope above change-point | <i>P</i> value for difference in slope | R <sup>2</sup> |
| <b>Mono</b>  | 8.308                                       | -4.120<br>(0.00019)         | 0.515                    | 0.268                    | 0.0160                                 | 99.56%         |
| <b>Di</b>    | 4.653                                       | -4.490<br>(2.5E-05)         | 1.027                    | 0.292                    | 2.2E-16                                | 99.75%         |
| <b>Tri</b>   | 3.391                                       | -6.488<br>(0.00012)         | 1.952                    | 0.293                    | 2.2E-16                                | 99.88%         |
| <b>Tetra</b> | 3.356                                       | -5.425<br>(0.0032)          | 1.672                    | 0.326                    | 2.2E-16                                | 99.82%         |

**Table S5. (A) Polymorphism Incidence and (B) Theta values for the four TR classes**

**A.**

| TR class    | Repeat Number | Polymorphism Incidence |             |             |
|-------------|---------------|------------------------|-------------|-------------|
|             |               | YRI                    | CEU         | JPTCHB      |
| <b>Mono</b> | 2             | 6.34E-03               | 5.34E-03    | 4.82E-03    |
|             | 3             | 9.44E-03               | 8.21E-03    | 7.35E-03    |
|             | 4             | 1.28E-02               | 1.07E-02    | 9.76E-03    |
|             | 5             | 0.035350423            | 0.030015425 | 0.027013951 |
|             | 6             | 0.121840212            | 0.103627062 | 0.092005076 |
|             | 7             | 0.295175867            | 0.264246267 | 0.232497578 |
|             | 8             | 1.601941086            | 1.352809271 | 1.248049496 |
|             | 9             | 3.033424427            | 2.457340732 | 2.204621653 |
|             | 10            | 5.976462562            | 4.637069471 | 4.087340365 |
|             | <b>Di</b>     | 2                      | 6.00E-03    | 3.87E-03    |
| 3           |               | 0.070371994            | 0.046863571 | 0.042985584 |
| 4           |               | 0.639148658            | 0.423592781 | 0.394090817 |
| 5           |               | 2.356982744            | 2.080957055 | 1.924174264 |
| 6           |               | 7.243115417            | 6.413392448 | 5.758739915 |
| 7           |               | 13.10240964            | 12.14105396 | 10.98918575 |
| 8           |               | 23.56761437            | 22.19339963 | 20.32155272 |
| 9           |               | 33.40966338            | 32.14940422 | 29.43871707 |
| <b>Tri</b>  |               | 2                      | 4.35E-03    | 2.93E-03    |
|             | 3             | 0.362563716            | 0.251148886 | 0.23392237  |
|             | 4             | 2.149944873            | 1.878143503 | 1.832566229 |
|             | 5             | 4.849795351            | 4.157312069 | 3.988251662 |
|             | 6             | 11.83277342            | 10.68843941 | 9.770222305 |
|             | 7             | 20.8547685             | 17.43527508 | 15.85563666 |
|             | 8             | 31.80105501            | 29.5403165  | 26.82170543 |
|             | <b>Tetra</b>  | 2                      | 1.37E-02    | 2.69E-03    |
| 3           |               | 0.621076734            | 0.42559682  | 0.389246572 |
| 4           |               | 2.940321291            | 2.47623903  | 2.142232585 |
| 5           |               | 8.285180905            | 7.328961361 | 6.247775009 |
| 6           |               | 16.13604904            | 14.04034352 | 12.36494598 |
| 7           |               | 25.32038835            | 24.59016393 | 20.85308057 |

**B.**

| TR class    | Repeat Number | Theta       |             |             |
|-------------|---------------|-------------|-------------|-------------|
|             |               | YRI         | CEU         | JPTCHB      |
| <b>Mono</b> | 2             | 4.36E-05    | 3.97E-05    | 3.60E-05    |
|             | 3             | 6.65E-05    | 6.12E-05    | 5.38E-05    |
|             | 4             | 8.15E-05    | 7.58E-05    | 6.90E-05    |
|             | 5             | 0.00012055  | 0.000110074 | 0.000100938 |
|             | 6             | 0.000254181 | 0.000233861 | 0.000208288 |
|             | 7             | 0.00051213  | 0.000487145 | 0.000424778 |
|             | 8             | 0.00754285  | 0.006346304 | 0.006117739 |
|             | 9             | 0.021942723 | 0.018798028 | 0.016817317 |
|             | 10            | 0.036968009 | 0.033156261 | 0.029456925 |
|             | <b>Di</b>     | 2           | 3.68E-05    | 2.70E-05    |
| 3           |               | 0.000470231 | 0.000337183 | 0.000308566 |
| 4           |               | 0.004371223 | 0.003131246 | 0.002841724 |
| 5           |               | 0.01679632  | 0.015591007 | 0.014215596 |
| 6           |               | 0.05042812  | 0.04691796  | 0.043438378 |
| 7           |               | 0.089110952 | 0.081329464 | 0.074679148 |
| 8           |               | 0.161969691 | 0.15080808  | 0.138290547 |
| 9           |               | 0.244308932 | 0.231465493 | 0.212395294 |
| <b>Tri</b>  |               | 2           | 2.66E-05    | 2.06E-05    |
|             | 3             | 0.00272718  | 0.002005706 | 0.001851005 |
|             | 4             | 0.016372411 | 0.015149574 | 0.013980667 |
|             | 5             | 0.035023233 | 0.030721388 | 0.030328081 |
|             | 6             | 0.088289466 | 0.086815074 | 0.076652748 |
|             | 7             | 0.158221961 | 0.147703061 | 0.128793494 |
|             | 8             | 0.269163378 | 0.249760058 | 0.233731846 |
|             | <b>Tetra</b>  | 2           | 8.94E-05    | 7.20E-05    |
| 3           |               | 0.004107482 | 0.003237235 | 0.002892039 |
| 4           |               | 0.021232175 | 0.018739421 | 0.01628053  |
| 5           |               | 0.064202797 | 0.056401373 | 0.050804832 |
| 6           |               | 0.120160074 | 0.102670138 | 0.09661464  |
| 7           |               | 0.224981115 | 0.210602773 | 0.183994594 |

**Table S6. Segmented regression model for log theta as a function of repeat number for mono-, di-, tri-, and tetranucleotide TRs in the CEU population.**

| TR class     | log(theta) ~ Repeat number |                      |                          |                          |                                 |                |
|--------------|----------------------------|----------------------|--------------------------|--------------------------|---------------------------------|----------------|
|              | Change point               | Intercept (P value)  | Slope below change point | Slope above change point | P value for difference in slope | R <sup>2</sup> |
| <b>Mono</b>  | 8.761                      | -8.0644<br>(0.126)   | 0.7168                   | 0.2465                   | 0.4348                          | 97.12%         |
| <b>Di</b>    | 4.658                      | -6.6106<br>(3.9E-06) | 1.032                    | 0.285                    | 2.2E-16                         | 99.78%         |
| <b>Tri</b>   | 3.356                      | -8.664<br>(6.9E-05)  | 1.989                    | 0.312                    | 2.2E-16                         | 99.86%         |
| <b>Tetra</b> | 3.363                      | -7.448<br>(0.0012)   | 1.653                    | 0.341                    | 2.2E-16                         | 99.87%         |



**Table S7. Primary Pol EF data for (A) mono-, and (B) dinucleotide TRs  
A.**

| 2 unit monos       | Target Location | TR mutants | Pol EF   |
|--------------------|-----------------|------------|----------|
| AA                 | 127-128         | 4          | 5.96E-03 |
|                    | 161-162         | 1          |          |
|                    | 164-165         | 0          |          |
| TT                 | 94-95           | 2          |          |
|                    | 111-112         | 62         |          |
|                    | 142-143         | 16         |          |
| CC                 | 99-100          | 3          |          |
|                    | 120-121         | 5          |          |
|                    | 129-130         | 1          |          |
|                    | 153-154         | 12         |          |
|                    | 167-168         | 63         |          |
| GG                 | 102-103         | 0          |          |
|                    | 118-119         | 1          |          |
|                    | 138-139         | 3          |          |
|                    | 155-156         | 7          |          |
| 2 unit monos       | Target Location | TR mutants | Pol EF   |
| TT                 | 127-128         | 8          | 5.17E-03 |
|                    | 161-162         | 9          |          |
|                    | 164-165         | 55         |          |
| AA                 | 94-95           | 0          |          |
|                    | 111-112         | 2          |          |
|                    | 142-143         | 1          |          |
| GG                 | 99-100          | 0          |          |
|                    | 120-121         | 6          |          |
|                    | 129-130         | 0          |          |
|                    | 153-154         | 0          |          |
|                    | 167-168         | 0          |          |
| CC                 | 102-103         | 60         |          |
|                    | 118-119         | 11         |          |
|                    | 138-139         | 18         |          |
|                    | 155-156         | 21         |          |
| total all mutants  |                 |            | 1134     |
| total TR mutants   |                 | 371        |          |
| avg Pol EF         |                 |            | 5.57E-03 |
| TR EF              |                 |            | 1.82E-03 |
| TR EF per site     |                 |            | 6.07E-05 |
| 3 unit monos       | Target Location | TR mutants | Pol EF   |
| CCC                | 147-149         | 18         | 7.98E-03 |
|                    | 180-182         | 6          |          |
|                    | 196-198         | 1          |          |
|                    | 269-271         | 0          |          |
| GGG                | 209-211         | 1          |          |
|                    | 232-234         | 1          |          |
|                    | 273-275         | 0          |          |
| TTT                | 212-214         | 2          |          |
| 3 unit monos       | Target Location | TR mutants | Pol EF   |
| GGG                | 147-149         | 0          | 1.34E-02 |
|                    | 180-182         | 1          |          |
|                    | 196-198         | 0          |          |
|                    | 269-271         | 0          |          |
| CCC                | 209-211         | 0          |          |
|                    | 232-234         | 1          |          |
|                    | 273-275         | 3          |          |
| AAA                | 212-214         | 0          |          |
| avg Pol EF         |                 |            | 1.07E-02 |
| total all mutants  |                 |            | 414      |
| total STR mutants  |                 |            | 34       |
| TR Pol EF          |                 |            | 8.76E-04 |
| TR Pol EF per site |                 |            | 5.47E-05 |
| 4 unit monos       | Target Location | TR mutants | Pol EF   |
| AAAA               | 190-194         | 2          | 7.98E-03 |
|                    | 241-244         | 6          |          |
| CCCC               | 226-229         | 2          |          |
| GGGG               | 237-240         | 9          |          |
| 4 unit monos       | Target Location | TR mutants | Pol EF   |
| TTTT               | 190-194         | 6          | 1.34E-02 |
|                    | 241-244         | 12         |          |
| GGGG               | 226-229         | 0          |          |
| CCCC               | 237-240         | 1          |          |
| avg EF             |                 |            | 1.07E-02 |
| total TR mutants   |                 |            | 38       |
| total all mutants  |                 |            | 414      |
| TR Pol EF          |                 |            | 9.79E-04 |
| TR Pol EF per site |                 |            | 1.22E-04 |
| 8 unit monos       | Target Location | TR mutants | Pol EF   |
| T8                 | TR site         | 26         | 3.10E-02 |
| A8                 | TR site         | 33         | 4.72E-02 |
| avg pol EF         |                 |            | 3.91E-02 |
| total TR mutants   |                 |            | 59       |
| total all mutants  |                 |            | 62       |
| TR Pol EF          |                 |            | 3.72E-02 |
| TR Pol EF per site |                 |            | 1.86E-02 |
| 10 unit monos      | Target Location | N mutants  | Pol EF   |
| G10                | TR site         | 57         | 4.60E-02 |
| C10                | TR site         | 22         | 2.47E-02 |
| avg EF             |                 |            | 3.54E-02 |
| total TR mutants   |                 |            | 79       |
| total all mutants  |                 |            | 95       |
| TR Pol EF          |                 |            | 2.94E-02 |
| TR Pol EF per site |                 |            | 1.47E-02 |

B.

|                             |               |                   |                      |
|-----------------------------|---------------|-------------------|----------------------|
| <b>2 unit dinucleotides</b> | <b>Pol EF</b> | <b>TR mutants</b> | <b>Total mutants</b> |
| GCGC                        | 2.90E-03      | 1                 | 61                   |
| CGCG                        | 4.10E-03      | 1                 |                      |
| avg EF                      | 3.50E-03      |                   |                      |
| sum                         |               | 2                 | 61                   |
| STR EF                      |               |                   | 1.15E-04             |
| per site                    |               |                   | 5.74E-05             |
| <b>3 unit dinucleotides</b> | <b>Pol EF</b> | <b>TR mutants</b> | <b>Total mutants</b> |
| TA                          | 7.99E-03      | 2                 | 19                   |
| TA                          | 3.10E-03      | 6                 | 11                   |
| TC                          | 3.00E-03      | 0                 | 18                   |
| TC                          | 1.80E-03      | 0                 | 17                   |
| AG                          | 2.40E-03      | 0                 | 12                   |
| AG                          | 2.80E-03      | 0                 | 12                   |
| avg EF                      | 3.52E-03      |                   |                      |
| sum                         |               | 8                 | 89                   |
| avg STR EF                  |               |                   | 3.16E-04             |
| avg STR EF per site         |               |                   | 1.05E-04             |
| <b>4 unit dinucleotides</b> | <b>Pol EF</b> | <b>TR mutants</b> | <b>Total mutants</b> |
| TC                          | 3.70E-03      | 5                 | 20                   |
| TC                          | 2.90E-03      | 3                 | 22                   |
| AG                          | 2.20E-03      | 2                 | 13                   |
| AG                          | 3.30E-03      | 1                 | 15                   |
| GT                          | 2.90E-03      | 0                 | 40                   |
| GT                          | 4.10E-03      | 2                 | 21                   |
| CA                          | 1.60E-03      | 1                 | 11                   |
| CA                          | 1.80E-03      | 1                 | 13                   |
| TA                          | 1.20E-02      | 14                | 19                   |
| TA                          | 1.83E-03      | 8                 | 11                   |
| avg EF                      | 3.63E-03      |                   |                      |
| TOTAL                       |               | 37                | 185                  |
| avg STR EF                  |               |                   | 7.27E-04             |
| avg STR EF per site         |               |                   | 1.45E-04             |
| <b>5 unit dinucleotides</b> | <b>Pol EF</b> | <b>TR mutants</b> | <b>Total mutants</b> |
| TA                          | 1.20E-02      | 6                 | 11                   |
| TA                          | 4.68E-03      | 18                | 22                   |
| TC                          | 5.40E-03      | 2                 | 23                   |
| TC                          | 3.80E-03      | 5                 | 20                   |
| AG                          | 4.00E-03      | 2                 | 16                   |
| AG                          | 5.00E-03      | 2                 | 18                   |
| GT                          | 2.10E-03      | 0                 | 20                   |
| GT                          | 2.80E-03      | 1                 | 20                   |
| CA                          | 3.50E-04      | 5                 | 10                   |
| CA                          | 2.00E-03      | 0                 | 14                   |
| avg EF                      | 4.21E-03      |                   |                      |
| sum                         |               | 41                | 174                  |
| avg STR EF                  |               |                   | 9.93E-04             |
| avg STR EF per site         |               |                   | 1.99E-04             |
| <b>6 unit dinucleotides</b> | <b>Pol EF</b> | <b>TR mutants</b> | <b>Total mutants</b> |
| TA                          | 1.99E-02      | 10                | 12                   |
| TA                          | 9.69E-03      | 16                | 18                   |
| GT                          | 4.10E-03      | 6                 | 21                   |
| GT                          | 4.10E-03      | 7                 | 21                   |
| CA                          | 5.10E-03      | 5                 | 24                   |
| CA                          | 5.20E-03      | 4                 | 20                   |
| avg EF                      | 8.02E-03      |                   |                      |
| sum                         |               | 48                | 116                  |
| avg STR EF                  |               |                   | 3.32E-03             |
| avg STR EF per site         |               |                   | 1.11E-03             |
| <b>8 unit dinucleotides</b> | <b>Pol EF</b> | <b>TR mutants</b> | <b>Total mutants</b> |
| GT                          | 2.60E-03      | 8                 | 27                   |
| GT                          | 3.30E-03      | 1                 | 21                   |
| CA                          | 3.30E-03      | 9                 | 14                   |
| CA                          | 4.70E-03      | 5                 | 13                   |
| TC                          | 1.20E-02      | 3                 | 11                   |
| TC                          | 8.30E-03      | 2                 | 17                   |
| AG                          | 2.00E-03      | 15                | 16                   |
| AG                          | 3.20E-03      | 16                | 19                   |
| TA                          | 2.12E-02      | 26                | 31                   |
| TA                          | 7.30E-03      | 35                | 40                   |
| avg EF                      | 6.79E-03      |                   |                      |
| sum                         |               | 120               | 209                  |
| avg STR EF                  |               |                   | 3.90E-03             |
| avg STR EF per site         |               |                   | 7.80E-04             |
| <b>9 unit dinucleotides</b> | <b>Pol EF</b> | <b>TR mutants</b> | <b>Total mutants</b> |
| GT                          | 5.40E-03      | 10                | 29                   |
| GT                          | 5.90E-03      | 11                | 19                   |
| CA                          | 3.30E-03      | 15                | 19                   |
| CA                          | 3.60E-03      | 12                | 20                   |
| avg EF                      | 4.55E-03      |                   |                      |
| sum                         |               | 48                | 87                   |
| avg STR EF                  |               |                   | 2.51E-03             |
| avg STR EF per site         |               |                   | 1.26E-03             |

**Table S8. Linear regression models for polymorphism incidence as a function of recombination rate for mono-, di-, tri-, and tetranucleotide TRs.**

| TR class     | Polymorphism incidence ~ Recombination rate |                         |                |
|--------------|---------------------------------------------|-------------------------|----------------|
|              | Intercept ( <i>P</i> value)                 | Slope ( <i>P</i> value) | R <sup>2</sup> |
| <b>Mono</b>  | -0.0139 (0.517)                             | 0.3891 (<2E-16)         | 4.62%          |
| <b>Di</b>    | -0.0058 (0.79)                              | 0.1626 (4.0E-05)        | 0.81%          |
| <b>Tri</b>   | 8E-04 (<2E-16)                              | 7.2E-05 (2.3E-08)       | 1.48%          |
| <b>Tetra</b> | 0.0015 (<2E-16)                             | 1.4E-04 (7.7E-07)       | 1.17%          |

**Table S9. Two sample mean t-test for recombination rate of polymorphic and non-polymorphic mono-, di-, tri-, and tetranucleotide TRs**

| TR class     | Mean recombination rate |                      | <i>P</i> value for difference in mean recombination rate between P and NP > 0 |
|--------------|-------------------------|----------------------|-------------------------------------------------------------------------------|
|              | Polymorphic (P)         | Non-polymorphic (NP) |                                                                               |
| <b>Mono</b>  | 0.977778                | 0.959090             | 2.2E-16                                                                       |
| <b>Di</b>    | 0.983590                | 0.968106             | 1.409E-07                                                                     |
| <b>Tri</b>   | 0.990975                | 0.966578             | 8.358E-09                                                                     |
| <b>Tetra</b> | 0.999976                | 0.968900             | 2.076E-08                                                                     |

**Table S10. Segmented regression model for log polymorphism incidence as a function of repeat number for motif-composition/structure based sub-classes of mono-, di-, tri-, and tetranucleotide TRs in the CEU population.**

| TR class     | Motif-composition/structure sub-class | log(Polymorphism incidence) ~ Repeat number |                      |                          |                          |                                 | R <sup>2</sup> |
|--------------|---------------------------------------|---------------------------------------------|----------------------|--------------------------|--------------------------|---------------------------------|----------------|
|              |                                       | Change point                                | Intercept (P value)  | Slope below change point | Slope above change point | P value for difference in slope |                |
| <b>Mono</b>  | A                                     | n.s.                                        | -3.362<br>(0.292)    | 0.317                    | n.s.                     | 0.792 (n.s.)                    | 96.53%         |
|              | G                                     | n.s.                                        | -5.740<br>(0.015)    | 0.7562                   | n.s.                     | 0.1351<br>(n.s.)                | 98.46%         |
| <b>Di</b>    | AC                                    | 4.532                                       | -4.414<br>(1.3E-05)  | 1.003                    | 0.3187                   | 2.2E-16                         | 99.82%         |
|              | AG                                    | 4.483                                       | -4.6681<br>(1.9E-06) | 1.093                    | 0.2851                   | 2.2E-16                         | 99.76%         |
|              | AT                                    | 5.491                                       | -4.0730<br>(1.2E-06) | 0.9166                   | 0.2005                   | 2.2E-16                         | 99.92%         |
|              | GC                                    | NA                                          |                      |                          |                          |                                 |                |
| <b>Tri</b>   | No secondary structure                | 3.467                                       | -5.839<br>(9.8E-05)  | 1.736                    | 0.289                    | 2.2E-16                         | 99.91%         |
|              | Triplex                               | 3.423                                       | -6.359<br>(8.7E-05)  | 1.915                    | 0.406                    | 2.2E-16                         | 99.94%         |
|              | Hairpin                               | 3.288                                       | -6.729<br>(0.0472)   | 2.051                    | 0.319                    | 2.2E-16                         | 99.82%         |
| <b>Tetra</b> | No secondary structure                | 3.390                                       | -5.050<br>(0.00528)  | 1.654                    | 0.295                    | 2.2E-16                         | 99.69%         |
|              | Triplex                               | 3.481                                       | -4.507<br>(0.00304)  | 1.385                    | 0.346                    | 1.2E-14                         | 99.86%         |
|              | Hairpin                               | 3.505                                       | -6.188<br>(0.00176)  | 1.821                    | 0.341                    | 2.2E-16                         | 99.90%         |

NA = data not available at all repeat numbers  
n.s.: no statistical significance

Figure S1. Proportion of polymorphic TRs by Tract length with proposed upper cut-offs

A. Dinucleotide TRs

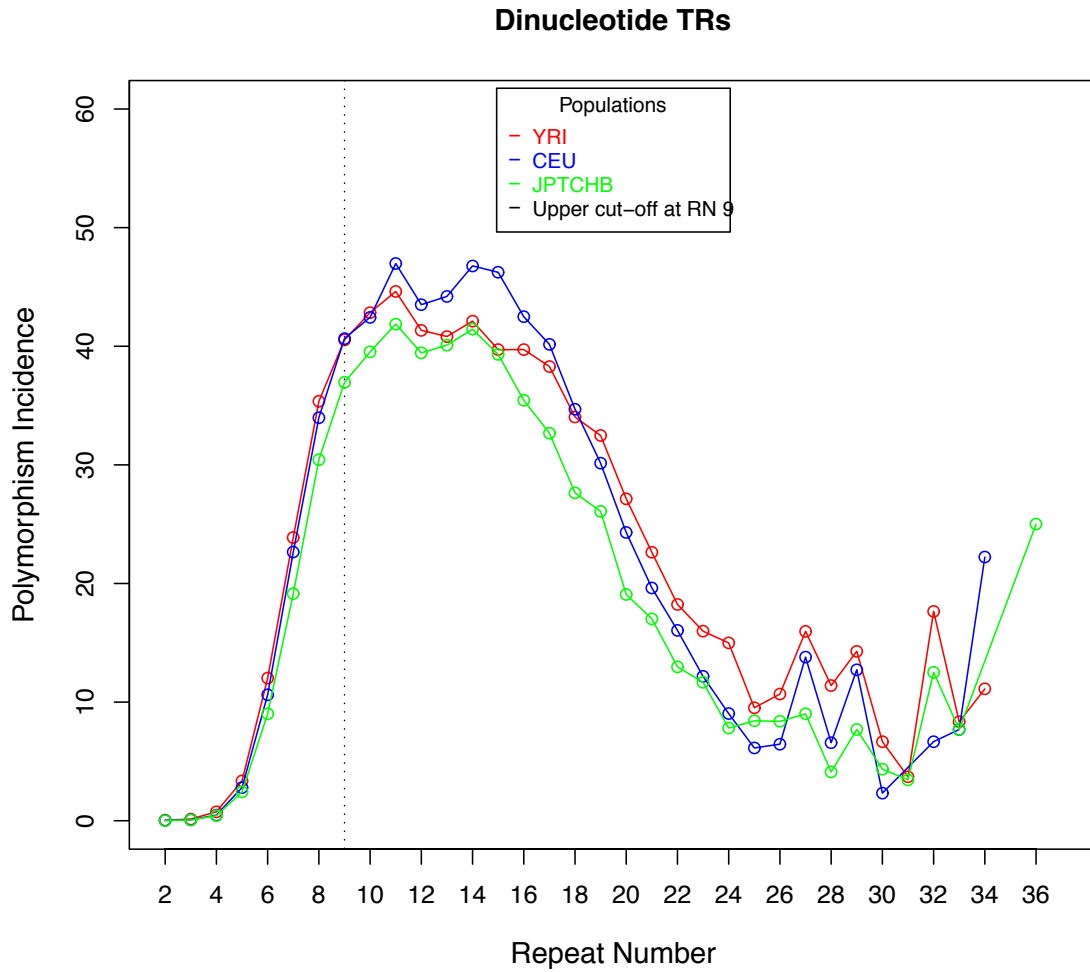

## B. Trinucleotide TRs

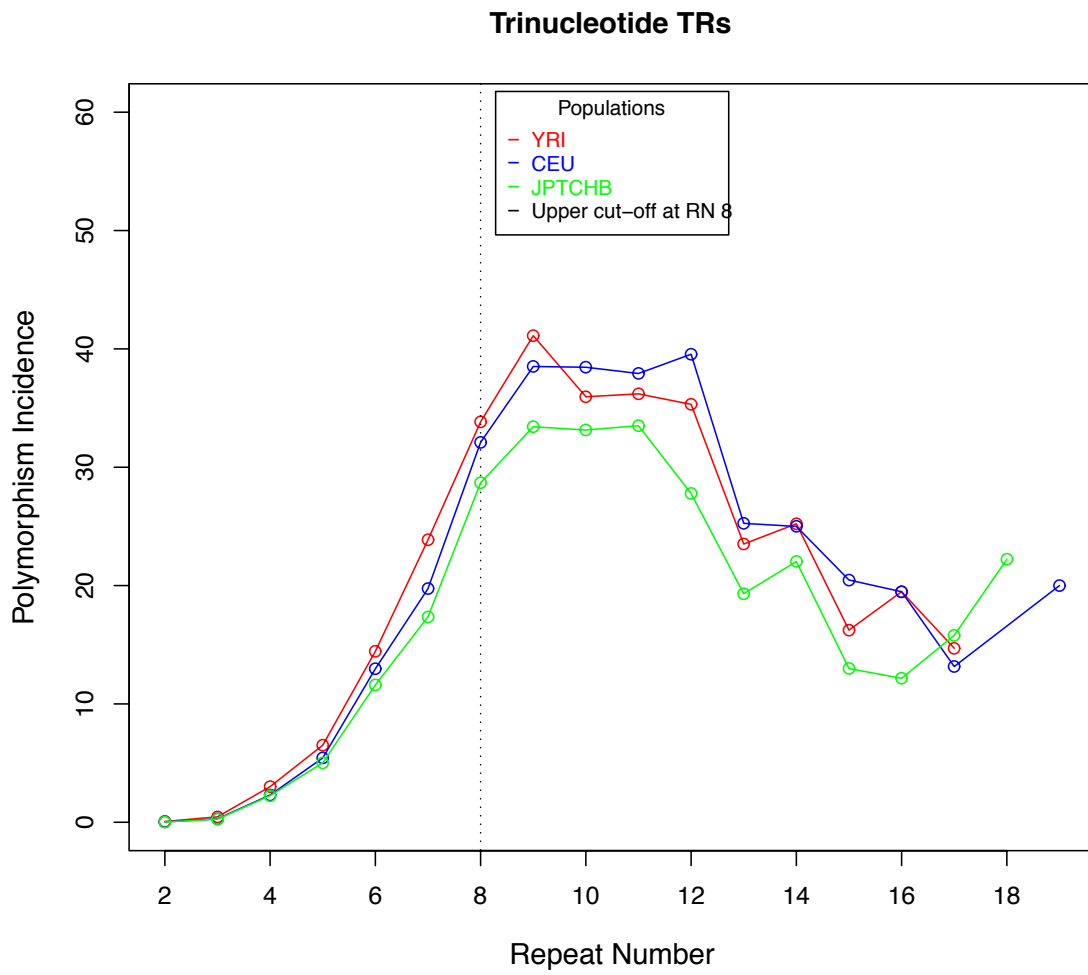



### C. Tetranucleotide TRs

Tetranucleotide TRs

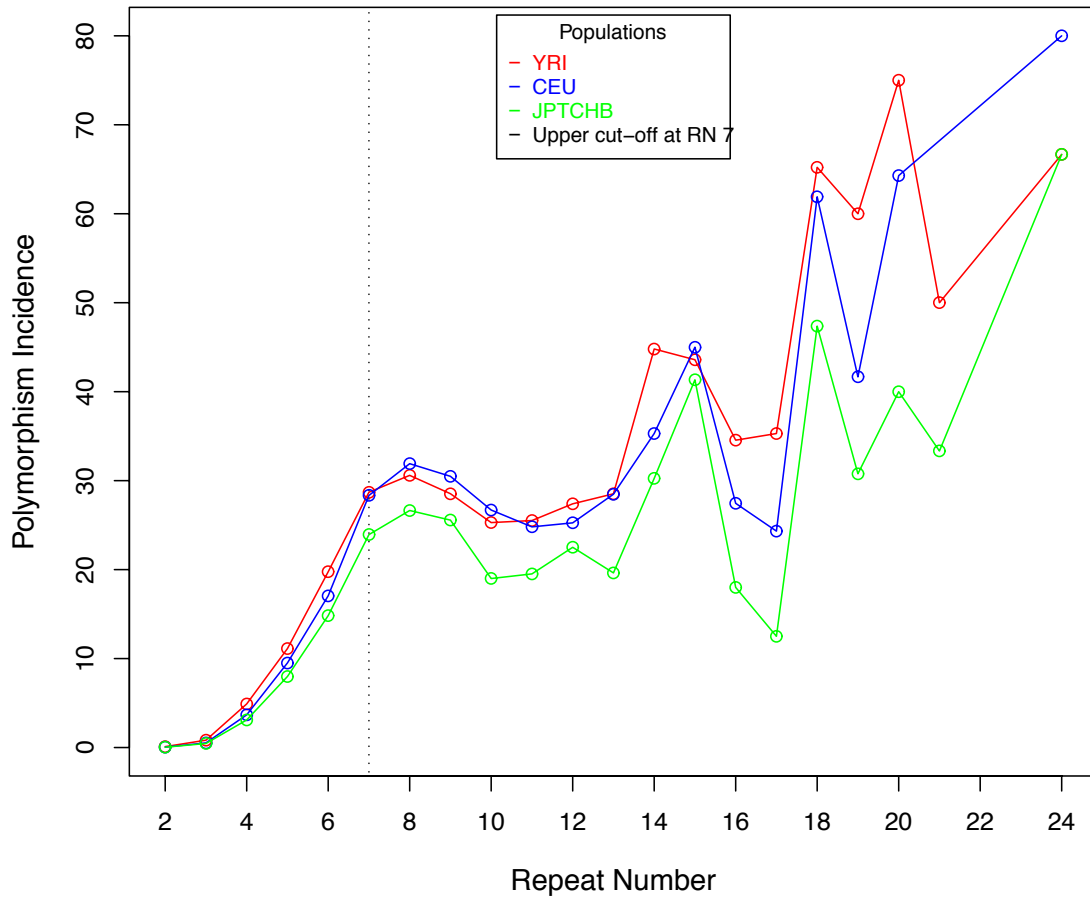

Supplement: supp_evs116_KM_121004_threshold_SUPP.pdf [file supp_evs116_KM_121004_threshold_SUPP.pdf]
